# Supplementary material
Source: Springer Nature journal article supplement (https://www.springermedizin.de/resource/supplementary/12969_2012_981_MOESM1_ESM.pdf/9589144)

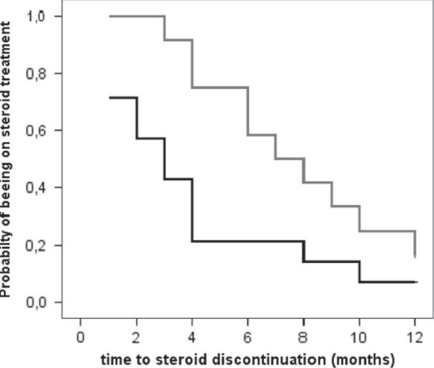

**(a)**

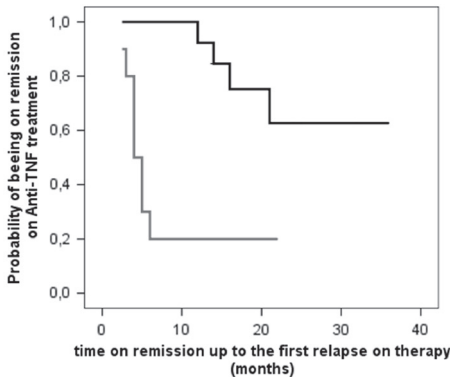

**(b)**

Supplement: MOESM1 [file 9589144]
